# Supplementary material for: (η5-Cyclopentadienyl)(η4-di- and tetra-phosphorylcyclobutadiene)cobalt(i): Synthesis, structure, and formation of 1-D coordination polymer
Source: Royal Society of Chemistry journal article supplement (doi:10.1039/b204779a), 2002-01-01
Supplement: b204779a.doc [file b204779a.doc]

# Supplementary data

**(**5-Cyclopentadienyl)(**4-di- and tetra-phosphorylcyclobutadiene)cobalt(I): Synthesis, structure, and formation of 1-D coordination polymer**

Shigeru Sasaki,* Yoshihiro Tanabe, and Masaaki Yoshifuji*

Department of Chemistry, Graduate School of Science, Tohoku University, Aoba, Sendai 980-8578, Japan.

Fax: +81 22 217 6562; Tel: +81 22 217 6558; E-mail: [yoshifj@mail.cc.tohoku.ac.jp](mailto:yoshifj@mail.cc.tohoku.ac.jp)

# Experimental

**General**

1H, 13C, and 31P NMR spectra were measured on a Bruker AC200P or a Bruker AM600 spectrometer, 1H and 13C NMR chemical shifts are expressed as **down-field from external tetramethylsilane. 31P NMR chemical shifts are expressed as **down-field from external 85% H3PO4. Infrared spectra and ultraviolet-visible spectra were collected on a Horiba FT-300 spectrometer and a Hitachi U-3210 spectrophotometer, respectively. Mass spectra were measured on a Hitachi M-2500S with electron impact (EI) ionization at 70 eV or a JEOL HX- 110 with fast atom bombardment (FAB) ionization using *m*-nitrobenzyl alcohol matrix. Melting points were measured on a Yanagimoto MP-J3 apparatus without correction. Microanalyses were performed at the Instrumental Analysis Center of Chemistry, Graduate School of Science, Tohoku University. Fuji Silysia Chemical BW-300 (32-53 m) was used for flash column chromatography. All reactions were carried out under argon. Acetylene **1a**, 1 **1b**,2 and **2**3 were synthesized according to the literature.

# Synthesis

**{(**4-1,3-Bis(diethoxyphosphoryl)-2,4-diphenyl)cyclobutadiene}(**5-cyclopentadienyl)cobalt(I) (3a)** To a xylene (15 mL) solution of (diethoxyphosphoryl)phenylacetylene (0.642 g, 2.70 mmol) was added dicarbonyl(****5**-cyclopentadienyl)cobalt(I) (0.25 mL, 2.19 mmol). The mixture was refluxed for 3.5 h under irradiation with a 500 W Xe-lamp to give a black suspension. After evaporation of the solvent, the residue was submitted to flash column chromatography (SiO2 / chloroform) to give **3a** (0.410 g, 0.684 mmol, 51%).

**3a**: red brown oil; 1H NMR (600 MHz, CDCl3) ** = 1.17 (t, *J* = 7.0 Hz, 12H, OCH2CH3), 4.02 (br. m, 8H, OCH2CH3), 4.97 (s, 5H, Cp), 7.24 (brm, 6H, Ph-*o*,*p*), 7.81 (brm, 4H, Ph-*m*); 13C NMR (150 MHz, CDCl3) ** = 16.2 (s, OCH2CH3), 57.0 (dd, *J*PC = 211 Hz, 3*J*PC = 19.6 Hz, C–P), 61.8 (pseudo t, 2*J*PC = 2.35 Hz, OCH2CH3), 83.6 (t, 2*J*PC = 7.5 Hz, C–Ph), 83.7 (s, Cp), 127.2 (s, Ph-*p*), 127.5 (s, Ph-*o*), 129.4 (s, Ph-*m*), 133.8 (s, Ph-*ipso*); 31P NMR (81 MHz, CDCl3) ** = 20.6 (s); UV-Vis (DMF, nm), **max (log**) 294 sh (4.53), 355 (3.85), 410 sh (3.47); MS (EI, 70 eV) *m/z* (rel intensity) 600 (*M*+; 100), 362 (*M*+–PhCCP(O)(OEt)2; 14), 124 (*M*+–2PhCCP(O)(OEt)2; 8). HRMS (EI, 70 eV) Found *m/z* 600.1236. Calcd for C29H35O6P2Co: *M*, 600.1241. Anal. Found: C, 53.77; H, 5.34 %. Calcd for C29H35O6P2Co •3H2O: C, 53.22; H, 5.39 %.

{**(**4-1,3-Bis(diphenylphosphoryl)-2,4-diphenyl)cyclobutadiene}(**5-cyclopentadienyl )cobalt(I) (3b)** Acetylene **1b** (1.009 g, 3.34 mmol) was allowed to react with dicarbonyl(**5-cyclopentadienyl)cobalt(I) (0.29 mL, 2.54 mmol) in xylene (20 mL) in a similar manner described for **3a**. After evaporation of the solvent, the residue was submitted to flash column chromatography (SiO2 / chloroform, chloroform / ethyl acetate) to give **3b** (0.437 g, 0.600 mmol, 23%). Recrystallization from ethanol afforded reddish-brown plates suitable for X-ray crystallography.

**3b**: reddish brown crystals (EtOH); mp 276-278 °C; 1H NMR (600 MHz, CDCl3) **= 5.06 (s, 5H, Cp), 6.87 (t, *J* = 7.8 Hz, 4H, P-Ph-*p*), 7.00 (t, *J* = 7.5 Hz, 2H, Ph-*p*), 7.19 (td, *J* = 7.1, 1.0 Hz, 8H, P-Ph-*m*), 7.28-7.35 (m, 8H, Ph-*o*, *m*), 7.48 (m, 8H, P-Ph-*o*); 13C NMR (150 MHz, CDCl3) ** = 66.1 (dd, 1*J*PC = 99.8 Hz, 3*J*PC = 15.8 Hz, C-P), 83.4 (s, Cp), 87.7 (t, 2*J*PC = 4.9 Hz, C-Ph), 126.9 (s, Ph-*p*), 127.6 (s, P-Ph-*p*), 127.8 (pseudo t, 3*J*PC = 6.1 Hz, P-Ph-*m*), 129.8 (s, Ph-*m*), 131.4 (s, Ph-*o*), 131.7 (pseudo t, 2*J*PC = 5.1 Hz, P-Ph-*o*), 132.4 (s, Ph-*ipso*), 132.9 (dd, 1*J*PC = 111.0 Hz, 5*J*PC = 1.8 Hz, P-Ph-*ipso*); 31P NMR (81 MHz, CDCl3) ** = 26.5 (s); UV-Vis (DMF, nm) **max (log**) 305 (4.59), 351 (4.08), 410sh (3.53); IR (KBr pellet) **(OH) 3372 cm–1; FAB MS *m/z* (rel intensity) 729 (*M*++1; 100), 663 (*M*+–Cp; 12), 528 (*M*++1–P(O)Ph2; 11), 463 (*M*++1–Cp–P(O)Ph2; 33), 426 (*M*+–PhCCP(O)Ph2; 51); Anal. Found: C, 72.54; H, 5.22%. Calcd for C45H35O2P2Co•EtOH: C, 72.80; H, 5.29%.

**(******5-Cyclopentadienyl){**4-1,2,3,4-tetrakis(diethoxyphosphoryl)cyclobutadiene}cobalt(I) (4)** To a xylene (15 mL) solution of bis(diethoxyphosphoryl)acetylene (0.861 g, 2.89 mmol) was added dicarbonyl(**5-cyclopentadienyl)cobalt(I) (0.20 mL, 1.76 mmol). The mixture was refluxed for 16 h to give a black suspension. The mixture was submitted to flash column chromatography (SiO2 / chloroform, ethyl acetate, ethyl acetate / ethanol = 10 / 1, 5 / l) to give **4** (0.410 g, 0.570 mmol, 39%).

**4**: black brown oil; 1H NMR (600 MHz, CDCl3) ** = 1.28 (t, *J* = 7.1 Hz, 24H, OCH2CH3), 4.12 (brm, 16H, OCH2CH3), 5.35 (s, 5H, Cp); 13C NMR (150 MHz, CDCl3) ** = 16.3 (s, OCH2CH3), 62.4 (s, OCH2CH3), 66.0 (ddt, 1*J*PC = 215.8 Hz, 3*J*PC = 16.7 Hz, 2*J*PC = 8.2 Hz, C-P), 84.2 (s, Cp); 31P NMR (81 MHz, CDCl3) **= 16.0 (s); UV-Vis (DMF, nm) **max (log**) 289 (4.23), 335sh (3.28), 400sh (2.99); FAB MS *m/z* (rel intensity) 721 (*M*++1; 100), 675 (*M*+ –OEt; 10). Anal. Found: C, 38.00; H, 5.83 %. Calcd for C25H45O12P4Co•4H2O: C, 37.89; H, 5.72%.

**Reaction of 4 with ammonium cerium(IV) hexanitrate** To an acetone (8 mL) solution of **4** (0.317 g, 0.440 mmol) was added ammonium cerium(IV) hexanitrate (0.487 g, 88.9 mmol) dissolved in acetone (8 mL) at –78 °C. The mixture was warmed to room temperature and the resultant yellowish-red suspension was filtered to give a yellow powder. Recrystallization from DMF-ethanol afforded **5** (0.227 g, 0.213 mmol, 48%).

**5**: yellow crystals (DMF-EtOH); mp > 300 °C; 1H NMR (600 MHz, DMSO-*d*6) ** = 1.34 (t, *J* = 7.0 Hz, 24H, OCH2CH3), 4.16 (brm, 16H, OCH2CH3), 5.39 (brs, 5H, Cp); 13C NMR (150 MHz, DMSO-d6) ** = 16.2 (s, OCH2CH3), 62.0 (s, OCH2CH3), 65.9 (dm, 1*J*PC = 229 Hz, C-P), 83.9 (s, Cp); 31P NMR (81 MHz, DMSO-*d*6) ** = 16.2 (s); UV-Vis (DMF, nm) **max(log**) 289 (4.48), 335sh (3.52), 400sh (3.25). Anal. Found: C, 28.87; H, 4.26; N, 4.14 %. Calcd for C25H45N3O21P4CoCe: C, 28.69; H, 4.33; N, 4.01 %.

***Cyclic voltammetry***

Cyclic voltammetry measurements were performed under nitrogen atmosphere at room temperature with a BAS CV-50W voltammetric analyzer under the conditions shown below Table 1.

# References

1. M. S. Chattha and A. M. Aguiar, *J. Org. Chem.*, 1971, **36**, 2719; E. Fluck and N. Z. Seng, *Anorg. Allg. Chem.*, 1972, **393**, 126

2. C. Charrier, W. Chodkiewicz and P. Cadiot, *Bull. Soc. Chim. Fr.,* 1966, **3**, 1002.

3. E. P. Kyba, S. P. Rines, P. W. Owens and S.-S. P. Chou, *Tetrahedron Lett.*, 1981, **22**, 1875.
